# Supplementary material for: Water-assisted synthesis of highly stable CsPbX3 perovskite quantum dots embedded in zeolite-Y
Source: Royal Society of Chemistry journal article supplement (doi:10.1039/d0ra08311a), 2021-01-01
Supplement: d0ra08311a1.pdf [file d0ra08311a1.pdf]

## **Water-Assisted Synthesis of Highly Stable CsPbX<sub>3</sub> Perovskite Quantum Dots embedded in Zeolite-Y**

*Hui Cheng,<sup>a,b</sup> Yanfeng Yin,<sup>b</sup> Jianbo Tang,<sup>b</sup> Donghua Fan,<sup>a\*</sup> Jan J. Huang,<sup>a\*</sup> Shengye  
Jin<sup>b\*</sup>*

<sup>a</sup>School of Applied Physics and Materials, Wuyi University, Jiangmen, 529020, China

<sup>b</sup>National Key Laboratory of Molecular Reaction Dynamics, Dalian Institute of  
Chemical Physics, Chinese Academy of Sciences, Dalian, China, 116023

### **Corresponding Author**

Shengye Jin ([sjin@dicp.ac.cn](mailto:sjin@dicp.ac.cn))

Jan J. Huang ([77290732@qq.com](mailto:77290732@qq.com))

Donghua Fan ([donghua\\_fan@126.com](mailto:donghua_fan@126.com))

The fluorescence quantum yield of CsPbBr<sub>3</sub>-Y measures the absolute quantum yield using Fluorescence Master Systems (Horiba M470). The system consists of an excitation light source (450 nm), an integrating sphere, a multi-channel detector capable of simultaneous detection of multiple wavelengths, and test software. During the test, CsPbBr<sub>3</sub>-Y powder is added into the sample cell for measurement, where the system will give the fluorescence quantum efficiency of the sample.

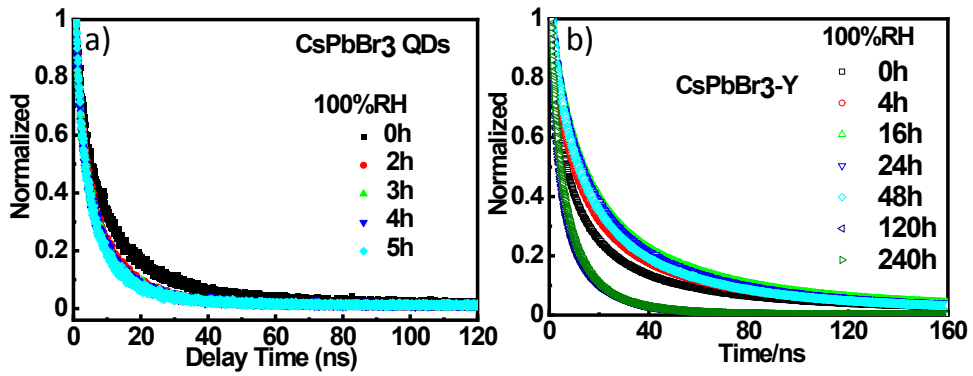

Figure S1. The emission decay curves of CsPbBr<sub>3</sub> ODs (a) and CsPbBr<sub>3</sub>-Y (b) in 100% relative humidity.

Table S1 The emission lifetimes of CsPbBr<sub>3</sub> ODs in 100%RH

| Time        | 0 h  | 2 h | 3 h | 4 h | 5 h |
|-------------|------|-----|-----|-----|-----|
| Lifetime ns | 10.5 | 7.1 | 6.7 | 6.5 | 5.9 |

Table S2 The emission lifetimes of CsPbBr<sub>3</sub>-Y in 100%RH

| Time        | 0 h  | 4 h  | 16 h | 24 h | 48 h | 120 h | 240 h |
|-------------|------|------|------|------|------|-------|-------|
| Lifetime ns | 16.8 | 21.1 | 25.4 | 24.1 | 22.4 | 7.6   | 8.4   |

The X-ray diffraction (XRD) patterns of the  $\text{CsPb}(\text{Cl}_{0.4}\text{Br}_{0.6})_3\text{-Y}$  and  $\text{CsPb}(\text{Br}_{0.6}\text{I}_{0.4})_3\text{-Y}$  possess similar characteristic peaks as that of  $\text{CsPbBr}_3\text{-Y}$ , where the diffraction patterns of zeolite-Y can only be clearly observed, which is due to the much stronger diffraction peaks in in zeolite-Y than the QDs.

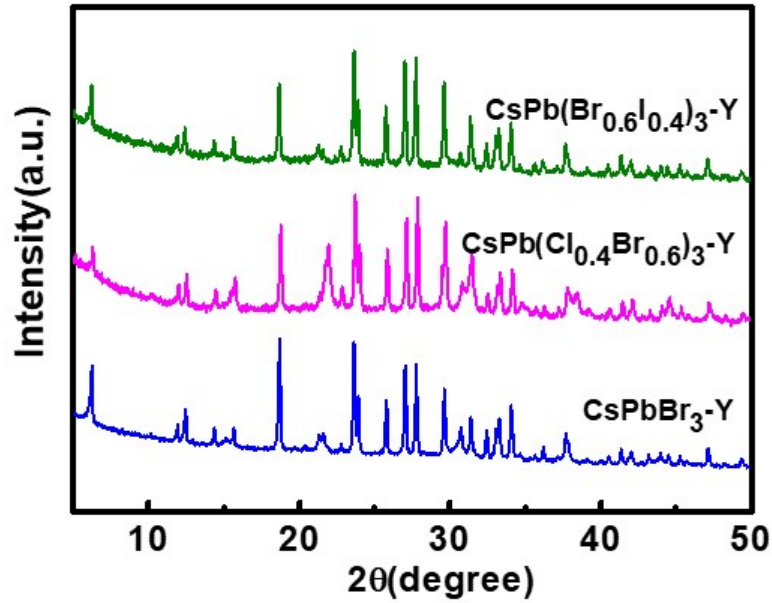

Figure S2. PXRD patterns of  $\text{CsPbBr}_3\text{-Y}$ ,  $\text{CsPb}(\text{Cl}_{0.4}\text{Br}_{0.6})_3\text{-Y}$ , and  $\text{CsPb}(\text{Br}_{0.6}\text{I}_{0.4})_3\text{-Y}$ .

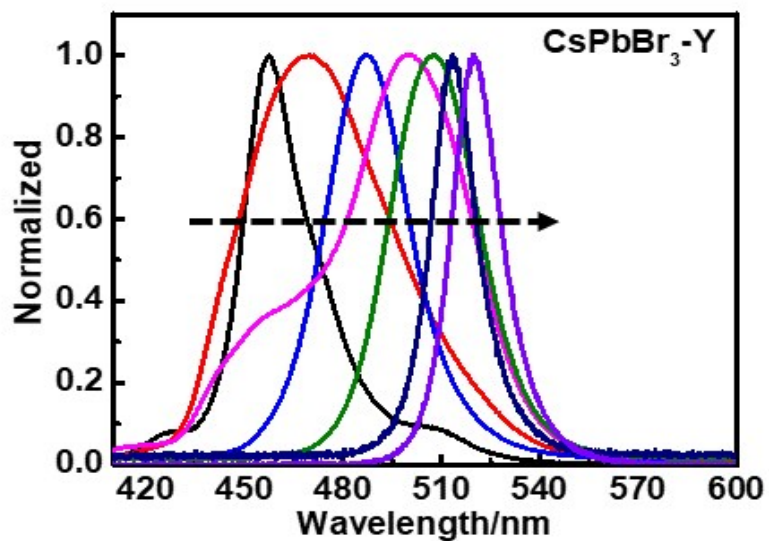

Figure S3. The emission spectra of CsPbBr<sub>3</sub>-Y with different size.

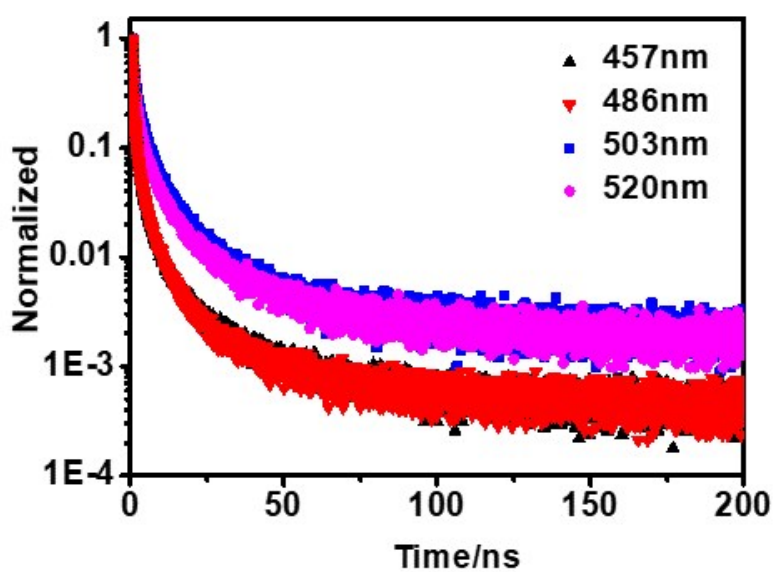

Figure S4. The emission decay curves of CsPbBr<sub>3</sub>-Y with different sizes.

Table S3. The emission lifetimes of CsPbBr<sub>3</sub>-Y with different sizes.

| Emission | 457 nm | 486 nm | 503 nm | 520 nm |
|----------|--------|--------|--------|--------|
|          |        |        |        |        |

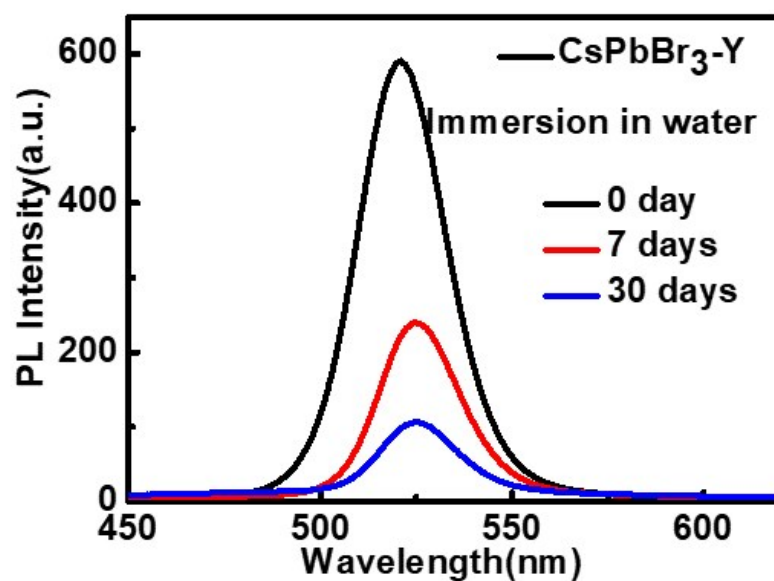

Figure S5. The emission spectra of CsPbBr<sub>3</sub>-Y after being immersed in water.

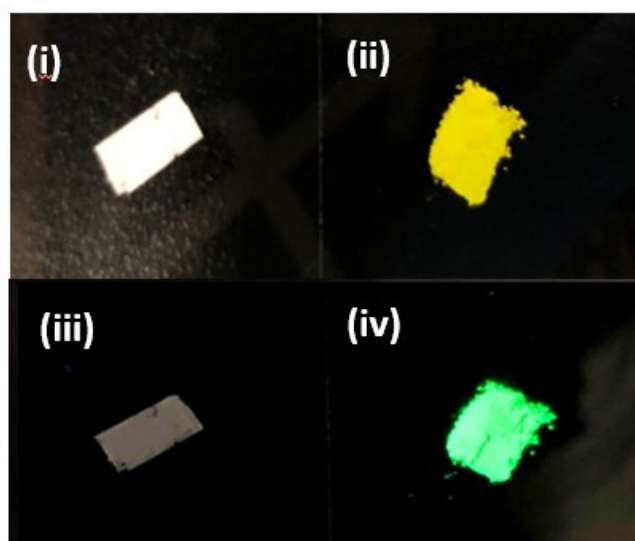

Figure S6. Cs<sub>4</sub>PbBr-Y in sun light (i), CsPbBr<sub>3</sub> in sun light (ii), Cs<sub>4</sub>PbBr<sub>6</sub>-Y under UV(iii), CsPbBr<sub>3</sub> under UV(iv);

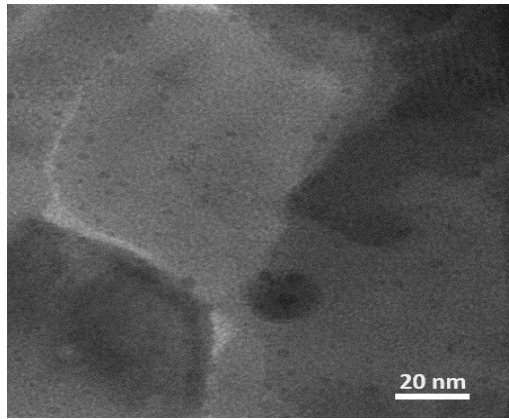

Figure S7. The TEM image of CsPbBr<sub>3</sub>-Y (White arrow: Zeolite-Y; Black arrow: QDs. The size of QDs is about 2-5 nm.
